# Supplementary material for: Clinical Utility of a Fully Automated Microsatellite Instability Test with Minimal Hands-on Time
Source: PubMed Central journal article supplement — J Pathol Transl Med. 2019 Oct 11;53(6):386–92. doi: 10.4132/jptm.2019.09.25 (PMC6877435; doi:10.4132/jptm.2019.09.25), 2019-10-11
Supplement: jptm-2019-09-25-suppl1.pdf [file jptm-2019-09-25-suppl1.pdf]

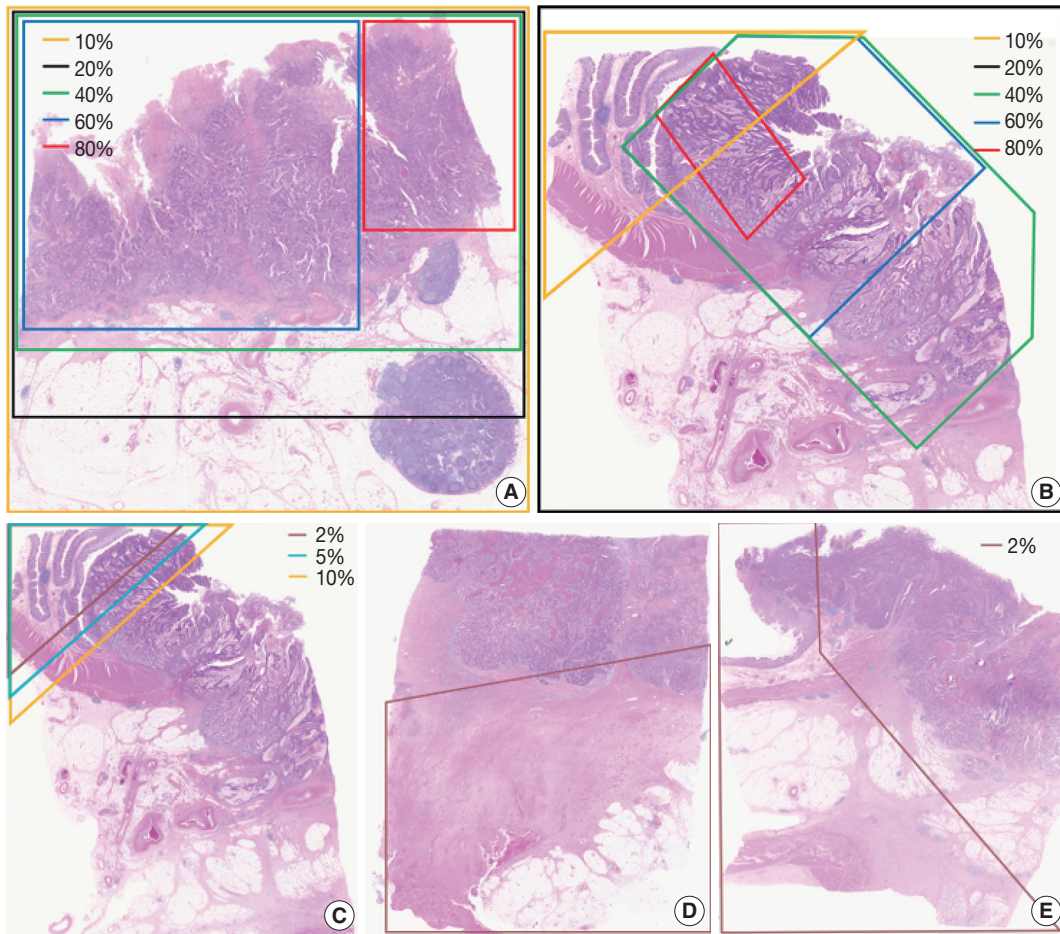

**Supplementary Fig. S1.** Various methods of tumor marking to achieve 80%, 60%, 40%, 20%, and 10% tumor purity on the H&E stained slides (A, case No. 118; B, case No. 104). Samples with extremely low tumor purity such as 5% and 2% are shown (C, case No. 104; D, case No.113; E, case No. 52).
